# Supplementary figures and images for: Effects of chloroplast dysfunction on mitochondria: white sectors in variegated leaves have higher mitochondrial DNA levels and lower dark respiration rates than green sectors
Source: PubMed Central journal article supplement — Protoplasma. 2011 Oct 8;249(3):805–17. doi: 10.1007/s00709-011-0325-y (PMC3382374; doi:10.1007/s00709-011-0325-y), 2011-10-08

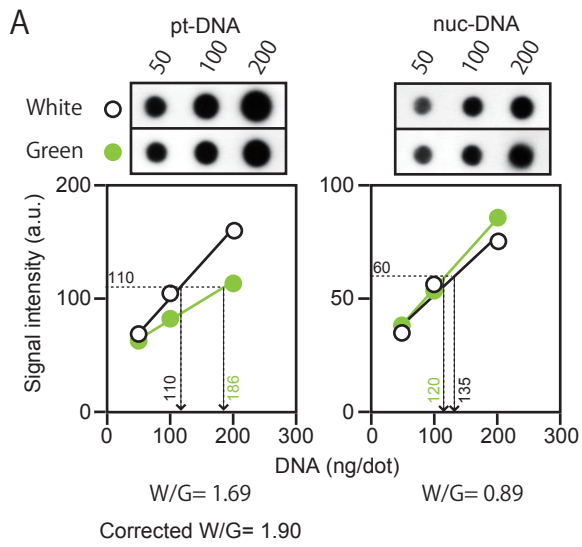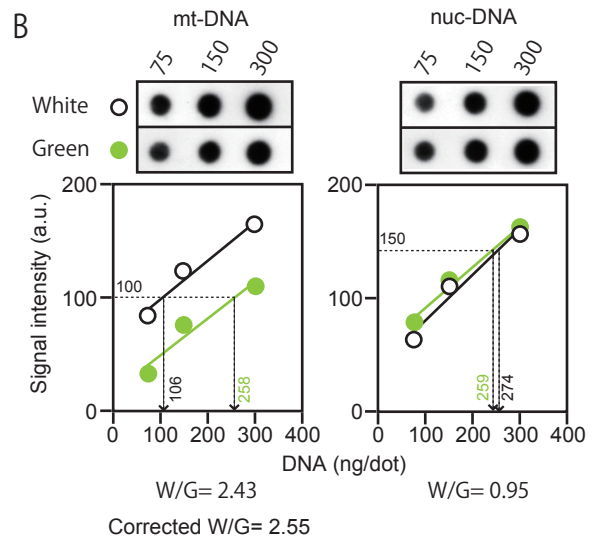

Supplement: 709_2011_325_MOESM1_ESM.pdf [file 709_2011_325_MOESM1_ESM.pdf]

**A**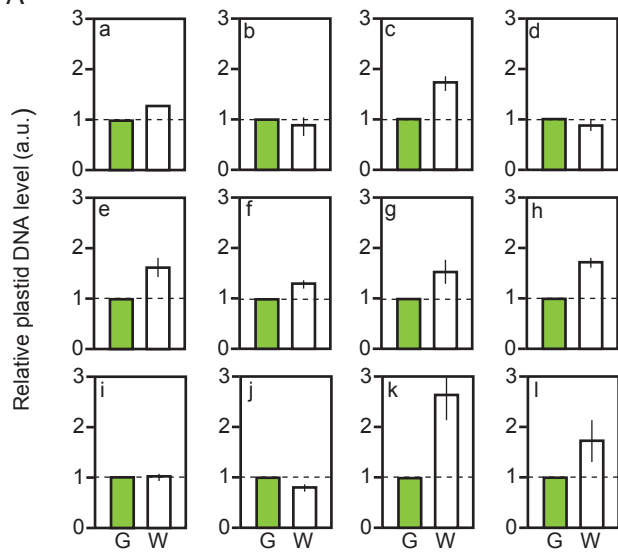**B**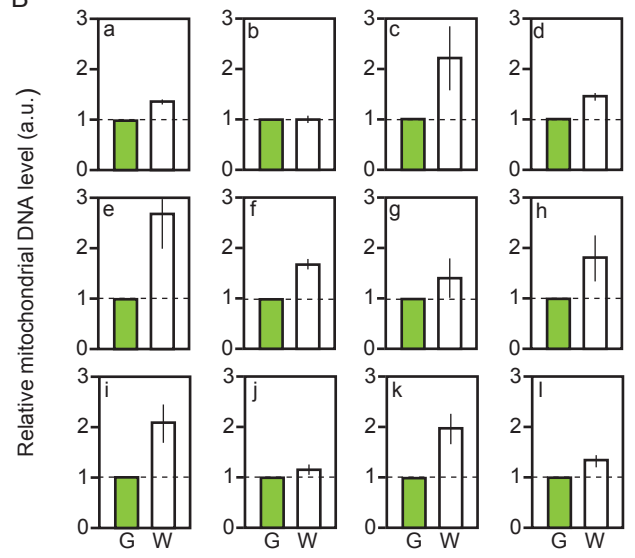

Supplement: 709_2011_325_MOESM2_ESM.pdf [file 709_2011_325_MOESM2_ESM.pdf]
